# Supplementary material for: An integrated co-expression network analysis reveals novel genetic biomarkers for immune cell infiltration in chronic kidney disease
Source: Front Immunol. 2023 Feb 17;14:1129524. doi: 10.3389/fimmu.2023.1129524 (PMC9981626; doi:10.3389/fimmu.2023.1129524)
Supplement: Supplementary file 5 [file Table_4.xlsx]

## Sheet: hubGenes_MMdarkolivegreen1
ADAM9
AEBP1
AIF1
ANKRD55
APBA2
ASXL2
ATP5C1
ATP5J
BLVRA
C14orf2
CAMK4
CBX7
CD27
CD36
CD3E
CD86
CDC25B
CEBPG
CNNM3
COL11A2
COX7B
CSF3R
CYBB
DBI
DDX17
DEF8
DENND2D
DGCR2
DGKA
DLEC1
DPYSL4
DSE
DUSP5
EPHX2
EPS8
FABP5
FAM102A
FCGR3B
FZD1
GBAS
GCAT
GCH1
GNL2
HCG18
HCG26
HKDC1
IL15
IL6R
IL7R
ITGA4
ITK
KCNIP1
KIAA1324
KLF11
KLF12
KYNU
LAP3
LAX1
LEF1
LGALS1
LOC100272216
LSM1
LSM3
LY9
MAFB
MAL
MAN1C1
MAPK9
MBD2
MEGF6
MMP25
MRPS15
MS4A4A
MYOF
NDE1
NDUFA6
NELL2
NMB
NUP93
OR7A10
PMAIP1
POLR2K
PRC1
PTAFR
RAB13
RAB27B
RAPGEF6
RBX1
RFPL2
RNF7
RPS27L
RPS6KA5
RPS7
S100A12
SAR1B
SCO2
SELL
SLC15A3
SLIRP
SNX4
SORL1
SPON1
ST14
STAT3
TCF7
TJP2
TLE2
TMEM204
TNFRSF10C
TRAPPC10
TRIM66
TSPAN5
TXK
TXN
UBASH3A
UBN1
WAS
XPO6
ZBTB44
ZC3H15
ZNF442
